# Supplementary material for: Magnetic zinc oxide nanoflower-assisted ionic liquid-based nanofluid dispersive liquid–liquid microextraction for the rapid determination of acaricides in tea infusions
Source: Royal Society of Chemistry journal article supplement (doi:10.1039/c6ra22353b), 2016-01-01
Supplement: c6ra22353b1.pdf [file c6ra22353b1.pdf]

Supplementary data

**Magnetic zinc oxide nanoflower-assisted ionic liquid-based nanofluid  
dispersive liquid-liquid microextraction for the rapid determination  
of acaricides in tea infusions**

Miyi Yang, Haozhe Zeng, Xiaoling Wu, Xiaoling Yang, Wenfeng Zhou,  
Sanbing Zhang, Runhua Lu, Jing Li, Haixiang Gao\*

*Department of Applied Chemistry, China Agricultural University, Yuanmingyuan  
West Road 2#, Haidian District, Beijing 100193, China*

Corresponding author. Tel.: +86 010 62835140; fax: +86 010 62835140.

E-mail address: hxgao@cau.edu.cn

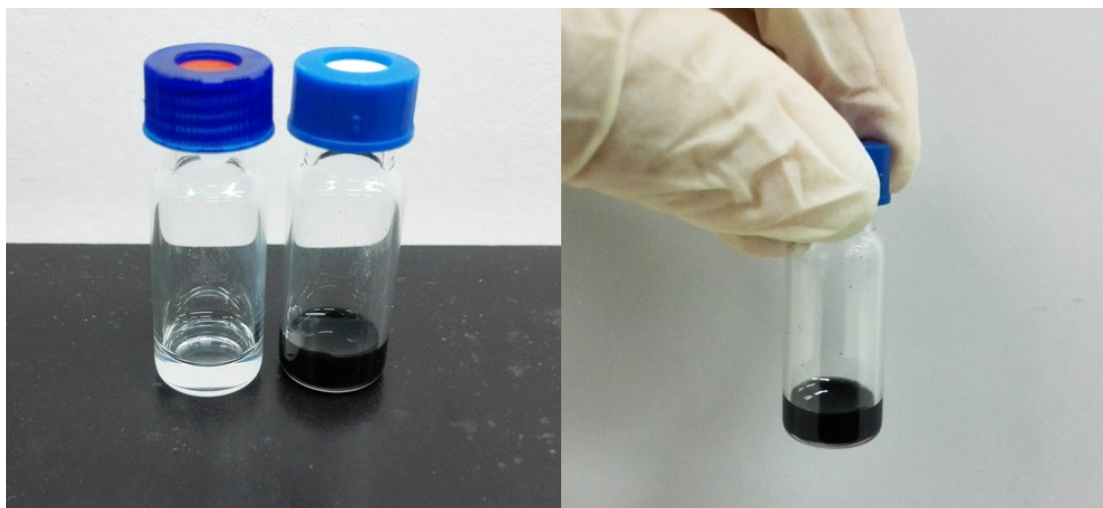

**Fig S1.** Photograph of the ZnO@Fe<sub>3</sub>O<sub>4</sub> nanofluid

| Standard order | Factors                |                        |                                 | Average recovery (%) |
|----------------|------------------------|------------------------|---------------------------------|----------------------|
|                | Ratio of nanoparticles | Mass of Nanofluid (mg) | Amount of magnetic sorbent (mg) |                      |
| 1              | 0.1%                   | 20                     | 10                              | 43.9                 |
| 2              | 0.1%                   | 30                     | 15                              | 49.9                 |
| 3              | 0.1%                   | 40                     | 20                              | 58.1                 |
| 4              | 0.1%                   | 50                     | 25                              | 53.4                 |
| 5              | 0.1%                   | 60                     | 30                              | 60.3                 |
| 6              | 0.2%                   | 20                     | 15                              | 53.9                 |
| 7              | 0.2%                   | 30                     | 20                              | 56.3                 |
| 8              | 0.2%                   | 40                     | 25                              | 70.5                 |
| 9              | 0.2%                   | 50                     | 30                              | 67.4                 |
| 10             | 0.2%                   | 60                     | 10                              | 65.4                 |
| 11             | 0.5%                   | 20                     | 20                              | 66.8                 |
| 12             | 0.5%                   | 30                     | 25                              | 80.6                 |
| 13             | 0.5%                   | 40                     | 30                              | 83.5                 |
| 14             | 0.5%                   | 50                     | 10                              | 88.3                 |
| 15             | 0.5%                   | 60                     | 15                              | 87.6                 |
| 16             | 1%                     | 20                     | 25                              | 79.3                 |
| 17             | 1%                     | 30                     | 30                              | 88.9                 |
| 18             | 1%                     | 40                     | 10                              | 92.2                 |
| 19             | 1%                     | 50                     | 15                              | 100.2                |
| 20             | 1%                     | 60                     | 20                              | 100.0                |
| 21             | 1.2%                   | 20                     | 30                              | 73.3                 |

|                |       |       |       |      |
|----------------|-------|-------|-------|------|
| 22             | 1.2%  | 30    | 10    | 78.2 |
| 23             | 1.2%  | 40    | 15    | 86.1 |
| 24             | 1.2%  | 50    | 20    | 90.3 |
| 25             | 1.2%  | 60    | 25    | 87.6 |
| K <sub>1</sub> | 53.13 | 63.47 | 73.61 |      |
| K <sub>2</sub> | 62.69 | 70.78 | 75.54 |      |
| K <sub>3</sub> | 81.37 | 78.07 | 74.31 |      |
| K <sub>4</sub> | 92.14 | 79.93 | 74.28 |      |
| K <sub>5</sub> | 83.12 | 80.19 | 74.70 |      |
| R              | 39.01 | 16.72 | 1.93  |      |

**Table S1.** Results for the orthogonal experiments

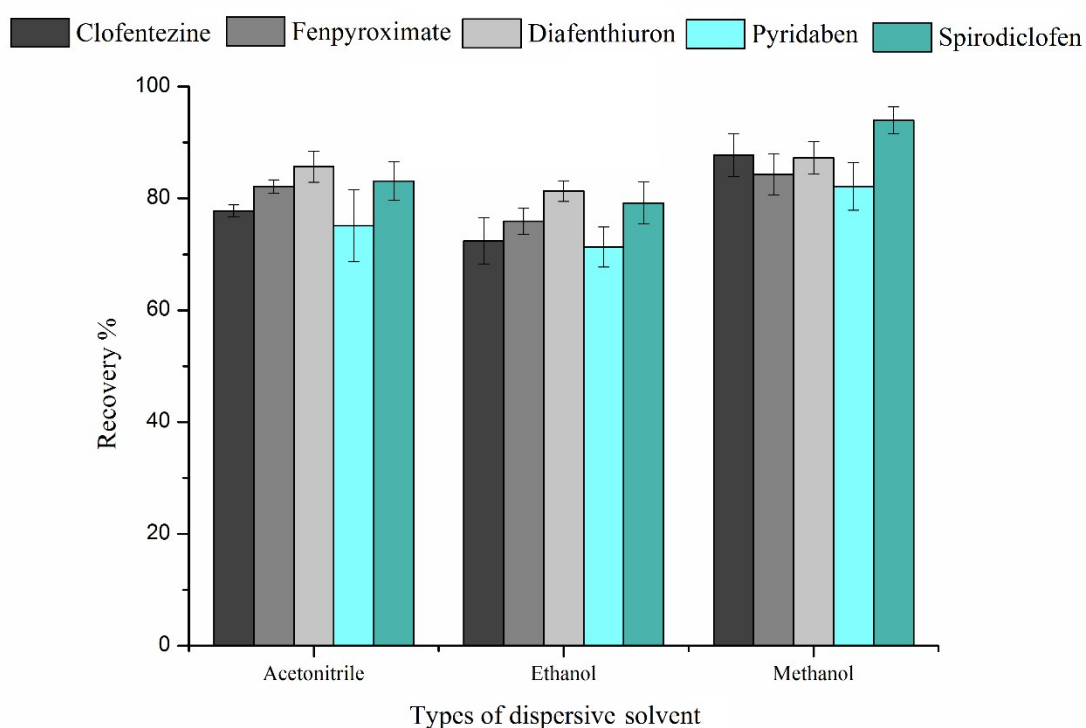

**Fig S2.** Effects of the types of dispersive solvent on the recoveries. The extraction conditions were as follows: extractant: 50mg [OMIMM]NTF<sub>2</sub> based nanofluid (1%); magnetic adsorbent, 15mg; vortex time, 2 min; dispersive volume, 200  $\mu$ L; no salt addition, concentration level, 50  $\mu$ g L<sup>-1</sup>; error bars, standard deviation (n=3).

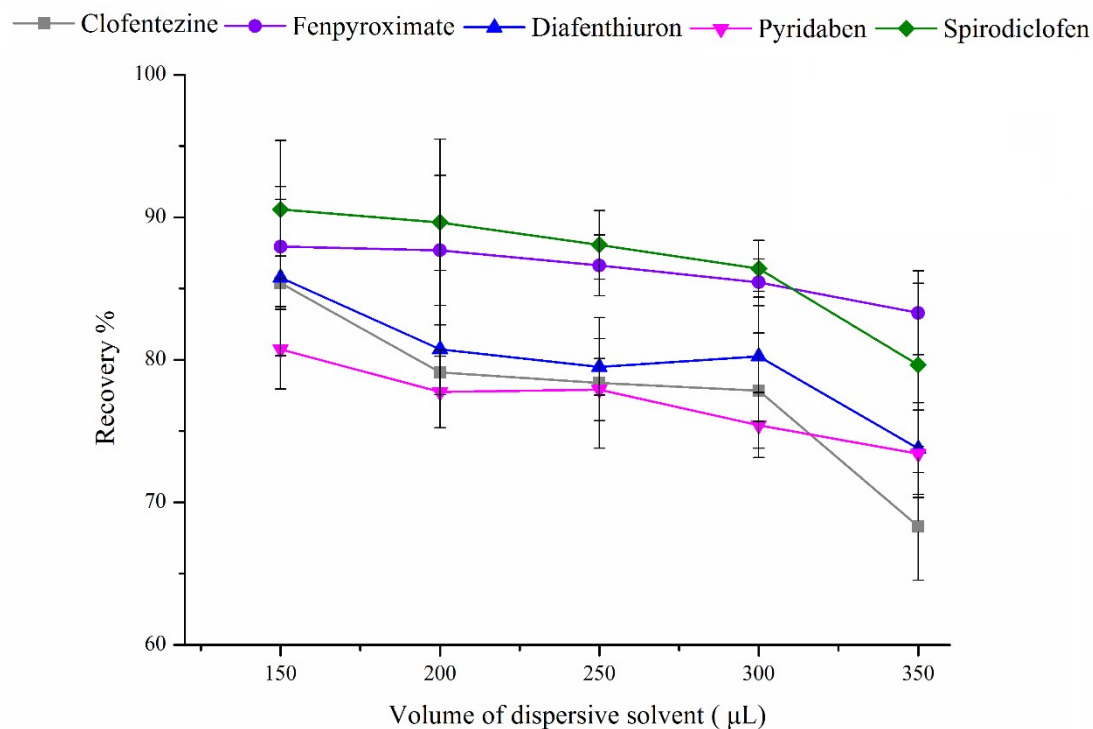

**Fig S3.** Effects of the volume of dispersive solvent on the recoveries. The extraction conditions were as follows: extractant: 50mg [OMIMM]NTF<sub>2</sub> based nanofluid (1%); magnetic adsorbent, 15mg; vortex time, 2 min; dispersive solution, methanol; no salt addition, concentration level, 50 µg L<sup>-1</sup>; error bars, standard deviation (n=3).

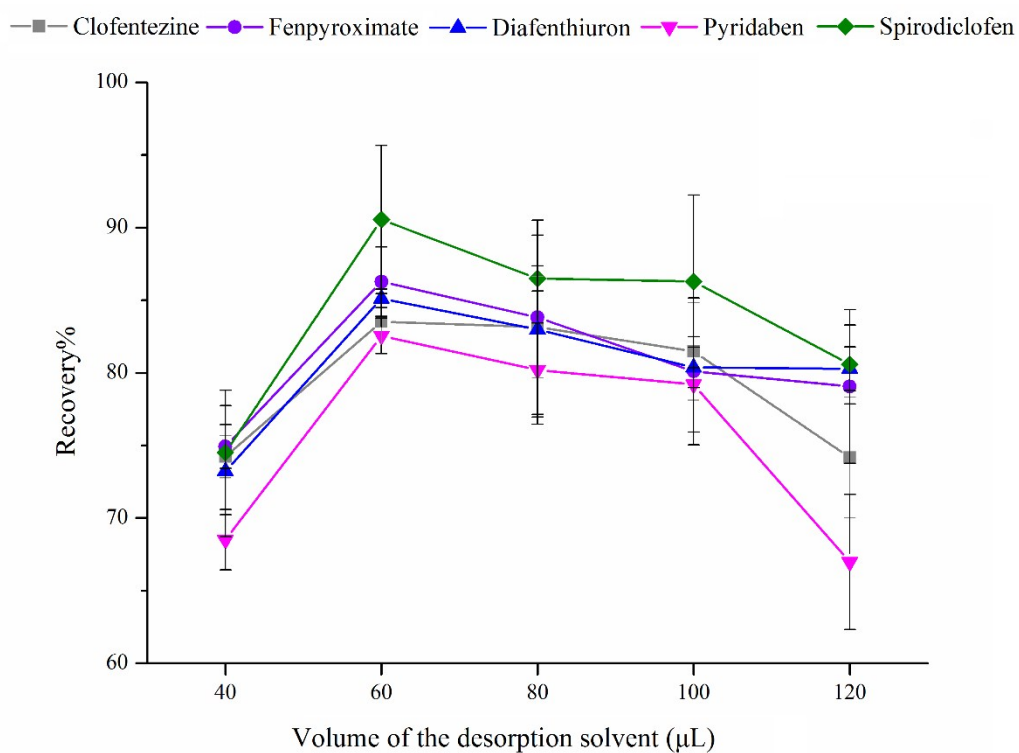

**Fig S4.** Effects of the volume of desorption solvent on the recoveries. The extraction conditions were as follows: extractant: 50mg [OMIM]NTF<sub>2</sub> based nanofluid (1%); magnetic adsorbent, 15mg; vortex time, 2 min; dispersive solvent, 150µL methanol; desorption solvent, acetonitrile; no salt addition; concentration level, 50 µg L<sup>-1</sup>; error bars, standard deviation (n=3).

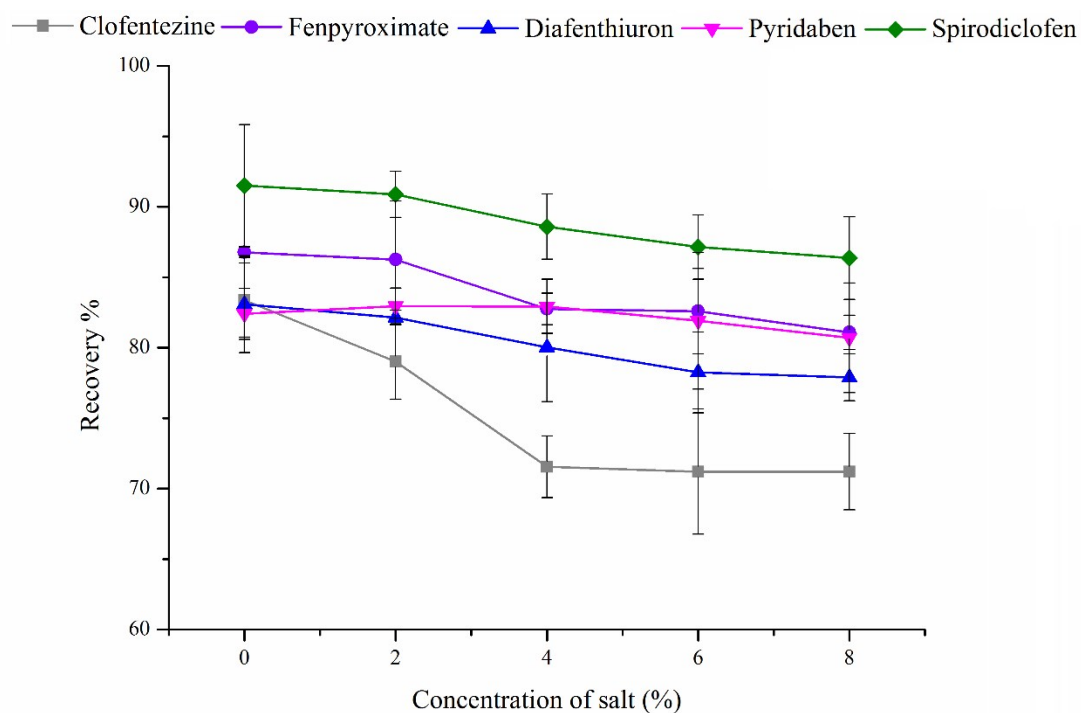

**Fig S5.** Effects of the ionic strength on the recoveries. The extraction conditions were as follows: extractant: 50mg [OMIMM]NTF<sub>2</sub> based nanofluid (1%); magnetic adsorbent, 15mg; vortex time, 2 min; dispersive solution, 150 $\mu$ L methanol; no salt addition; concentration level, 50  $\mu$ g L<sup>-1</sup>; error bars, standard deviation (n=3).
